# Supplementary material
Source: PubMed Central journal article supplement (PMC2981546)

**Figure S1. Effect of 14E11 on the aPTT of mammalian plasmas**

Baboon (□), pig (■), or rabbit (Δ) plasma supplemented with varying concentration of 14E11 were tested in an aPTT assay, as described under Methods.

**Figure S2. Factor XI in plasma from mice treated with 14E11**

Western blot of non-reducing 7.5% polyacrylamide gels of mouse plasma collected at intervals after 14E11 infusion (0.8 mg/dl). The left hand panel shows time points from 0 and 30 min, while the right hand panel shows results for two mice (1 and 2) at longer intervals after treatment. Plasma from a fXI deficient (XI<sup>-/-</sup>) mouse and a recombinant mouse fXI standard (rFXI) are on the left. The detection antibody was biotinylated-14E11. The position of fXI on the blots is indicated by the arrow marked “XI” at the right of the figure. The band running above fXI may be plasma IgG, and is varies in intensity on different blots. Note that it is present in fXI deficient plasma (left hand lane). Positions of molecular mass standards are shown to the left of the blot.

**Figure S3. Dose response study of 14E11 antibody in the mouse FeCl<sub>3</sub> carotid artery thrombosis model**

Varying doses of 14E11 antibody were administered through the internal jugular vein to groups of five wild type C57Bl/6 mice, followed by testing in the carotid artery thrombosis model with 7.5% FeCl<sub>3</sub>, as described in Methods. Bar height indicates percent of mice in each group that had patent arteries 30 minutes after FeCl<sub>3</sub> application.

**Figure S4. Effect of 14E11 on platelet adhesion to fXI and fXIa**

(A) Shown are platelets adhering to glass cover slips coated with fXI (top row), fXIa (middle row) or fibrinogen (FG – bottom row) in the presence of vehicle (–), 14E11, or non-specific IgG. Imaging was by Köhler illuminated Nomarski differential interference contrast as described in Methods. (B) Bar graphs indicate the mean number ± SEM of platelets per mm<sup>2</sup> adherent to control (BSA), fXI, fXIa or FG coated cover slips.

Figure S1

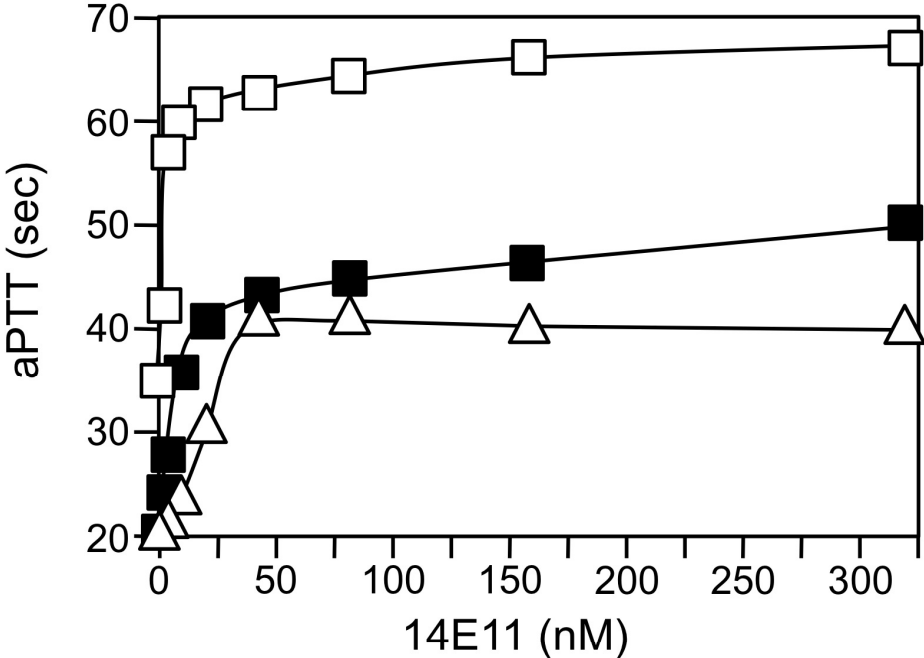

Figure S2

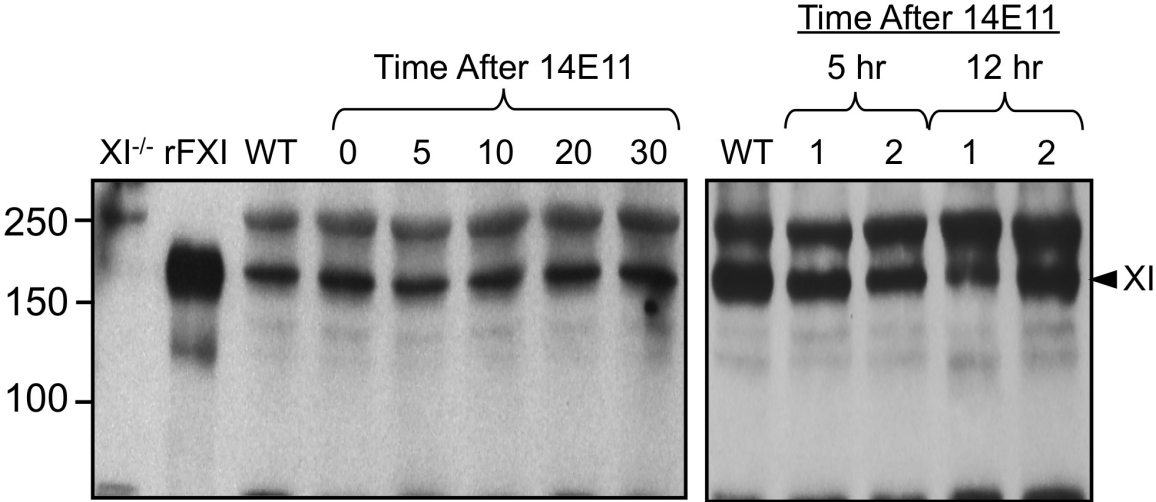

Figure S3

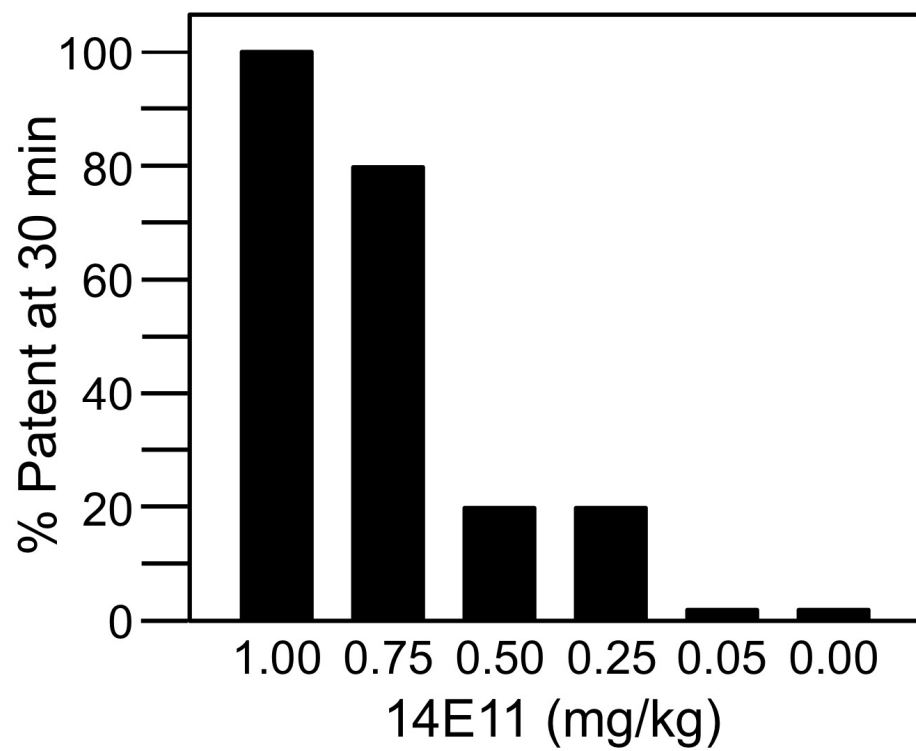

Figure S4

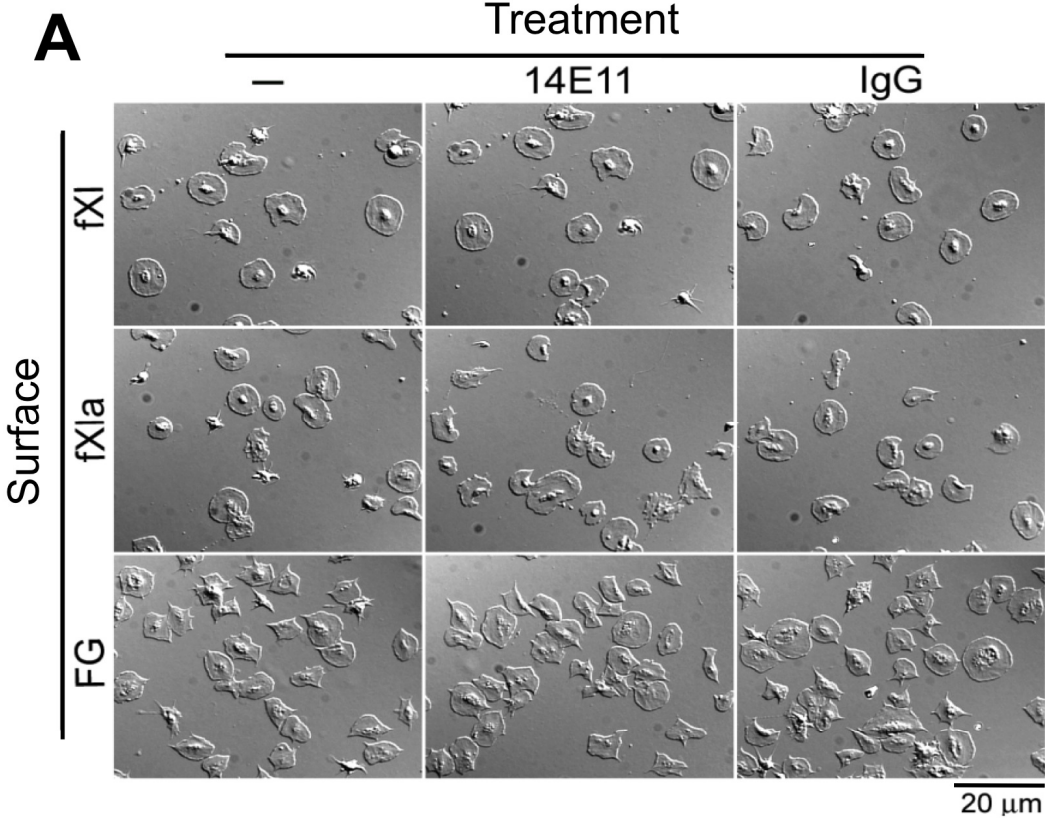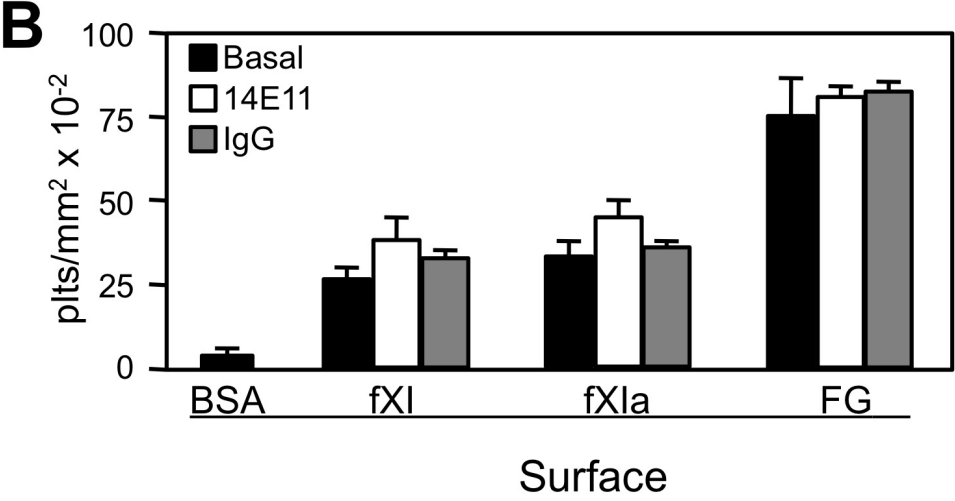

Supplement: blood-2010-02-270918_1.pdf [file blood-2010-02-270918_1.pdf]
